# Supplementary material for: Facile large-scale synthesis of Au–Pt alloyed nanowire networks as efficient electrocatalysts for methanol oxidation and oxygen reduction reactions
Source: Royal Society of Chemistry journal article supplement (doi:10.1039/c5ra18133j), 2015-01-01
Supplement: c5ra18133j1.pdf [file c5ra18133j1.pdf]

Electronic Supplementary Information

**Facile large-scale synthesis of Au-Pt alloyed nanowire networks as  
efficient electrocatalysts for methanol oxidation and oxygen  
reduction reactions**

Pei Song,† Shan-Shan Li,† Li-Li He, Jiu-Ju Feng, Liang Wu, Shu-Xian Zhong, Ai-Jun Wang\*  
*College of Geography and Environmental Science, College of Chemistry and Life Science,  
Zhejiang Normal University, Jinhua 321004, China*

† *These authors contributed equally to this work.*

\**Corresponding Author: ajwang@zjnu.cn (A.J. Wang); Tel./Fax: +86 579 82282269.*

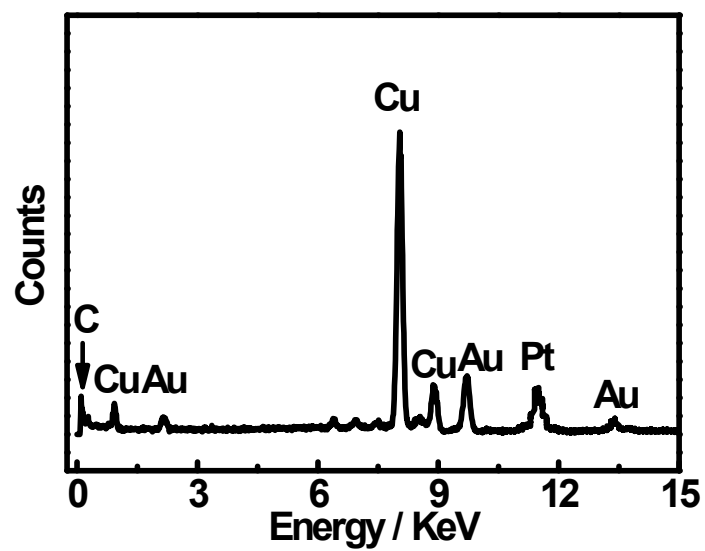

Fig. S1 EDS pattern of AuPt NNs.

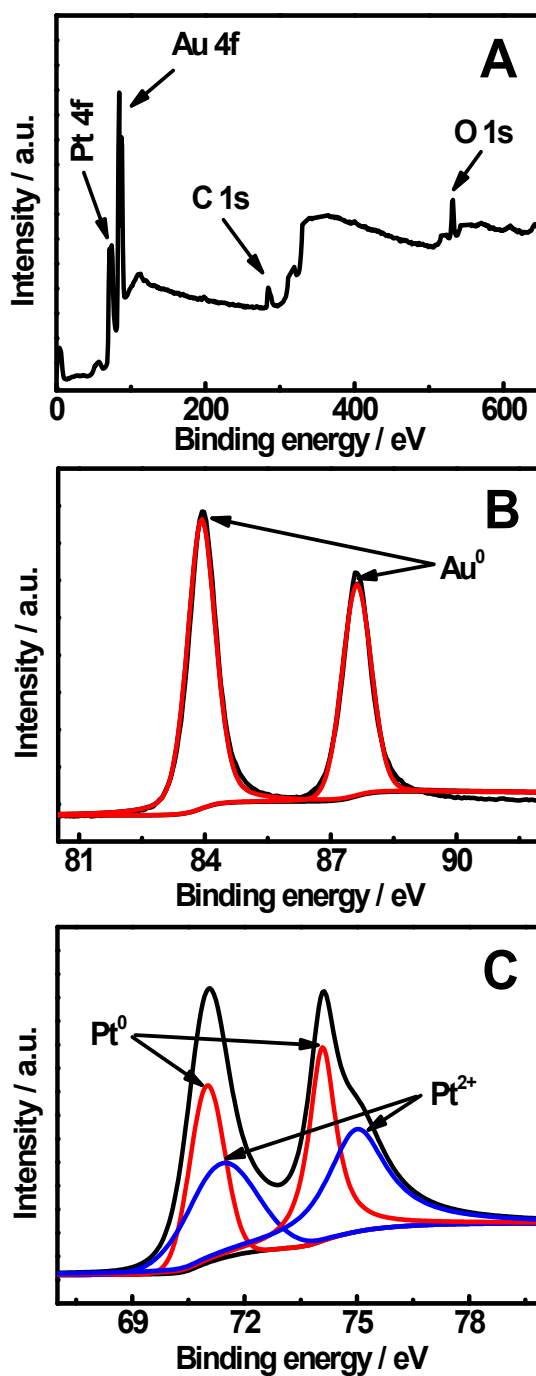

**Fig. S2** Survey (A), high-resolution Au 4f (B) and Pt 4f (C) XPS spectra of AuPt NNs.

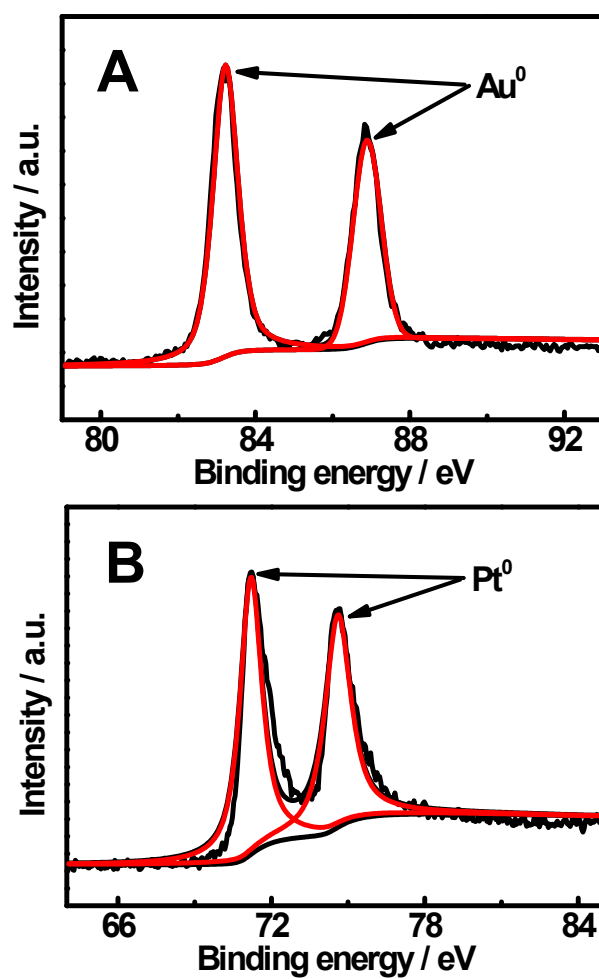

**Fig. S3** High-resolution XPS spectra of Au 4f for Au nanoparticles (A) and Pt 4f for Pt nanoparticles (B).

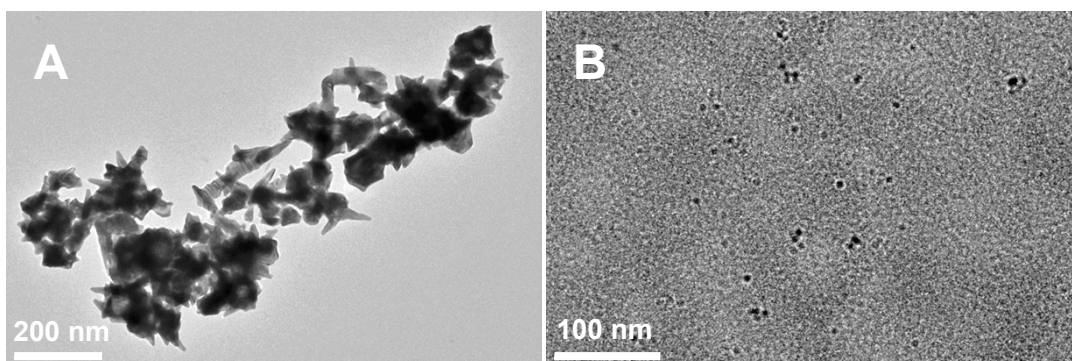

**Fig. S4** TEM images of Au nanoparticles (A) and Pt nanoparticles (B).

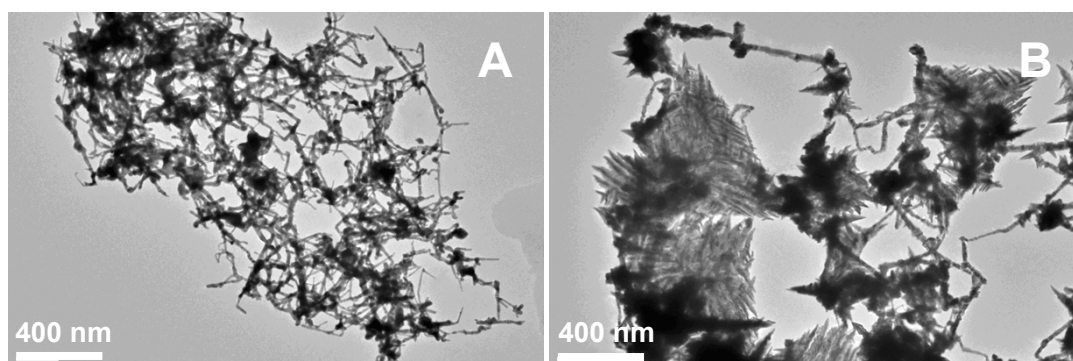

**Fig. S5** TEM images of AuPt products obtained at the reaction temperature of 60 °C (A) and 40 °C (B).

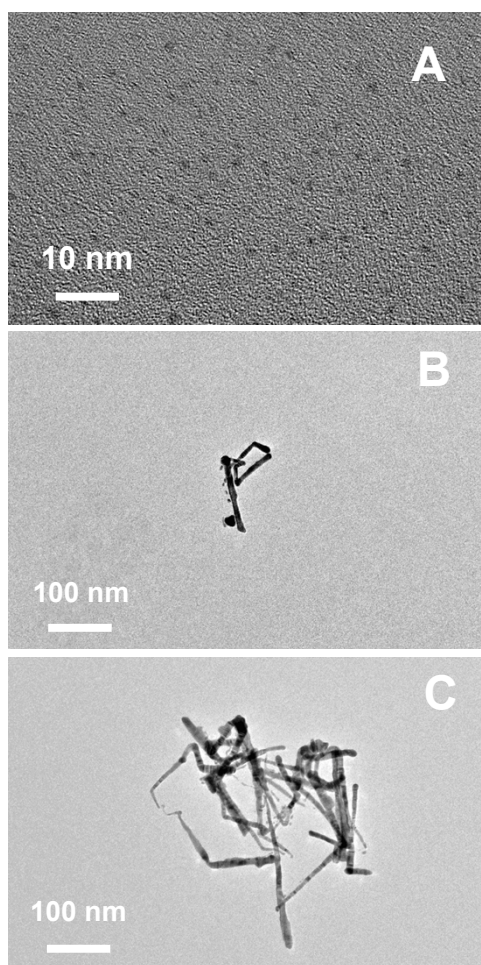

**Fig. S6** TEM images of the typical AuPt products obtained with the reaction time of 0.5 min (A), 1 min (A), and 2 min (B).

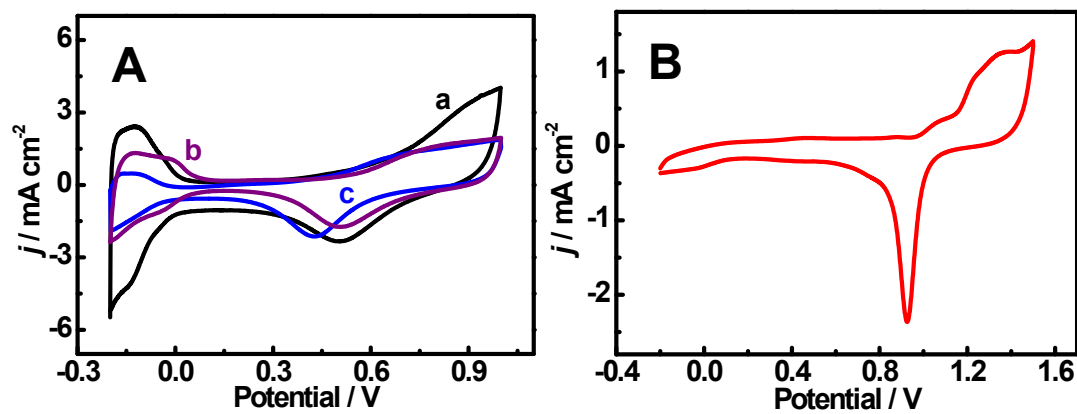

**Fig. S7** (A) CV curves of AuPt NNs (curve a), Pt black (curve b), and Pt nanoparticles (curve c) modified electrodes in 0.5 M H<sub>2</sub>SO<sub>4</sub> at a scan rate of 50 mV s<sup>-1</sup>, along with (B) Au nanoparticles modified electrode.



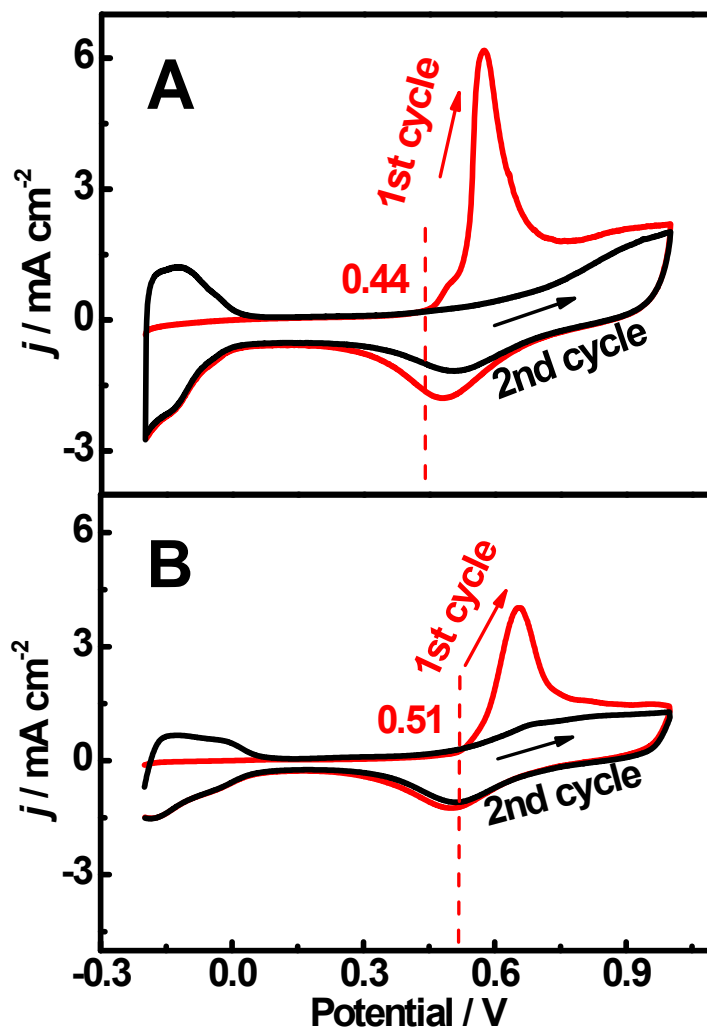

**Fig. S8** CO-stripping voltammograms of AuPt NNs (A) and Pt black (B) modified electrodes in 0.5 M  $\text{H}_2\text{SO}_4$  at a scan rate of  $50 \text{ mV s}^{-1}$ .

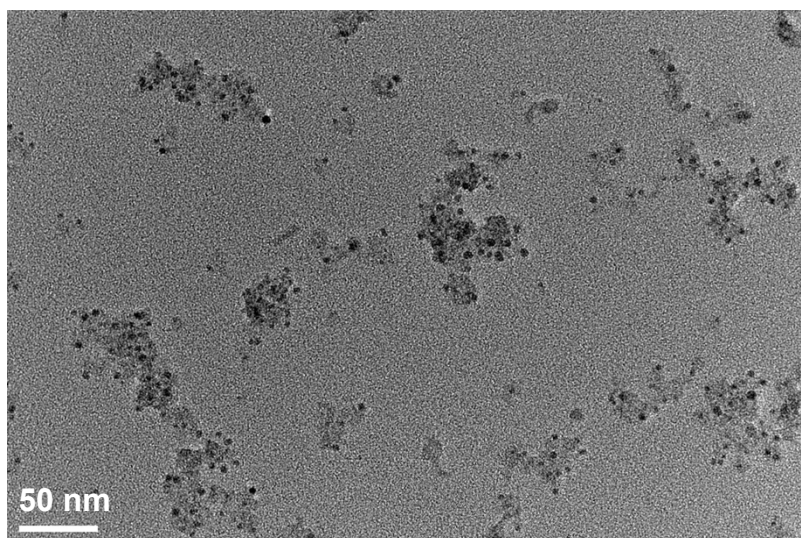

**Fig. S9** Representative TEM image of Pt black.
